# Supplementary material for: Incaspitolide A extracted fromCarpesium cernuuminduces apoptosisin vitrovia the PI3K/AKT pathway in benign prostatic hyperplasia
Source: Oxford University Press journal article supplement (doi:10.1042/bsr20210477), 2021-06-01
Supplement: bsr-2021-0477_supp.pdf [file bsr-2021-0477_supp.pdf]

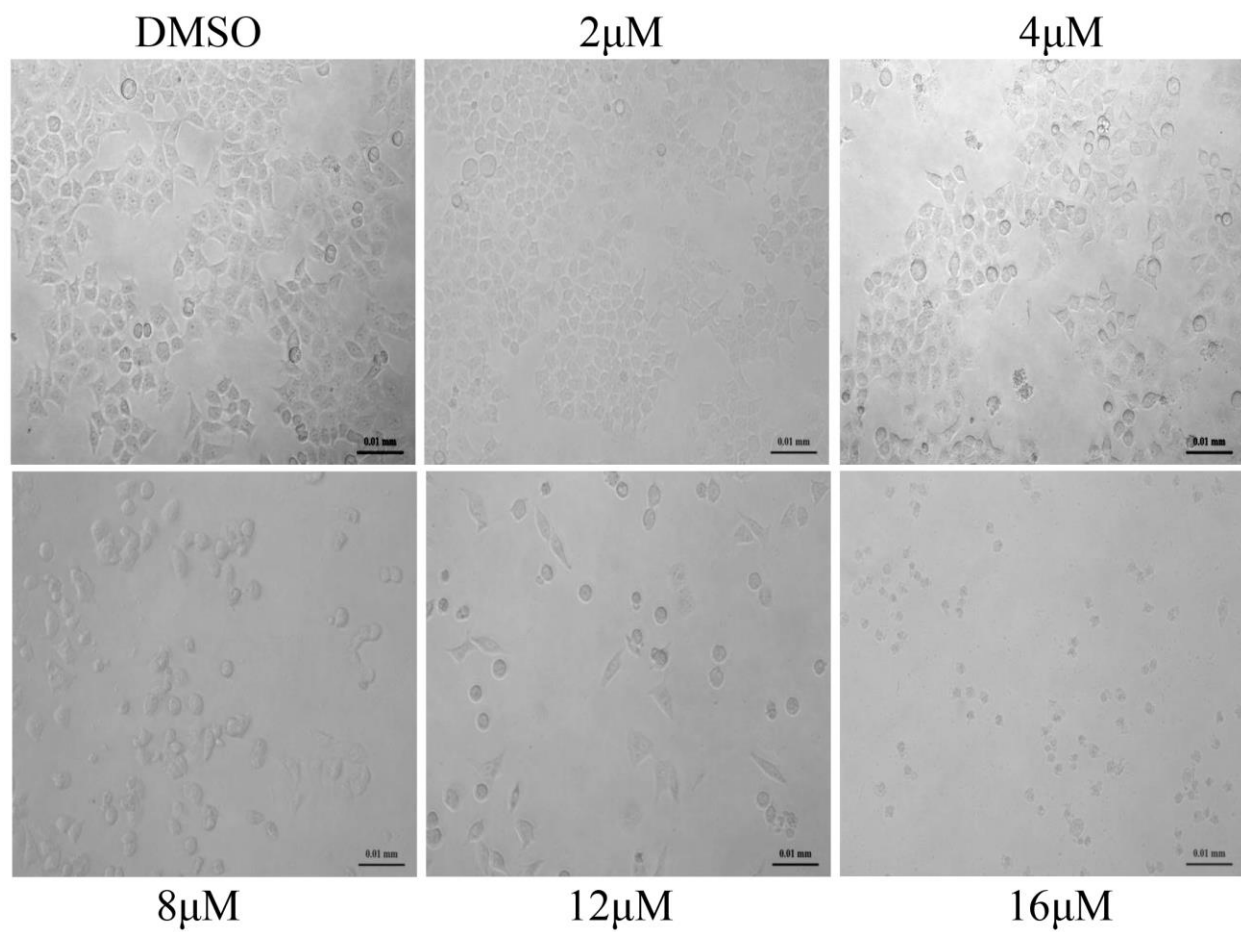

**Supplementary Figure 1.** Representative image of BPH-1 cells treated with TMJ-12 for 48 h (magnification,  $\times 200$ ; scale bar, 0.01 mm), TMJ-12 inhibited the cell viability and proliferation of the BPH-1 cells.
